# Supplementary material for: Cationic amphiphilic dendrons with effective antibacterial performance
Source: Royal Society of Chemistry journal article supplement (doi:10.1039/d1tb02037d), 2021-12-10
Supplement: d1tb02037d1.pdf [file d1tb02037d1.pdf]

### **Cationic amphiphilic dendrons with effective antibacterial performance**

Wei Guo<sup>a,b</sup>, Yongjie Wang<sup>c,d</sup>, Pengqi Wan<sup>a,b</sup>, Hao Wang<sup>b</sup>, Li Chen<sup>a,\*</sup>, ShaoKun Zhang<sup>c</sup>, Chunsheng Xiao<sup>b,\*\*</sup>, Xuesi Chen<sup>b</sup>

<sup>a</sup> Department of Chemistry, Northeast Normal University, Changchun 130024, P. R. China

<sup>b</sup> Key Laboratory of Polymer Ecomaterials, Changchun Institute of Applied Chemistry, Chinese Academy of Sciences, Changchun 130022, P. R. China

<sup>c</sup> Department of Spinal Surgery, the First Hospital of Jilin University, Changchun, China

<sup>d</sup> Molecular Bacteriology Laboratory, Institute of Military Veterinary Medicine, Academy of Military Medical Science, Changchun, China

\* Corresponding authors

E-mail addresses:

chenl686@nenu.edu.cn (L. Chen); xiaocs@ciac.ac.cn (C. Xiao)

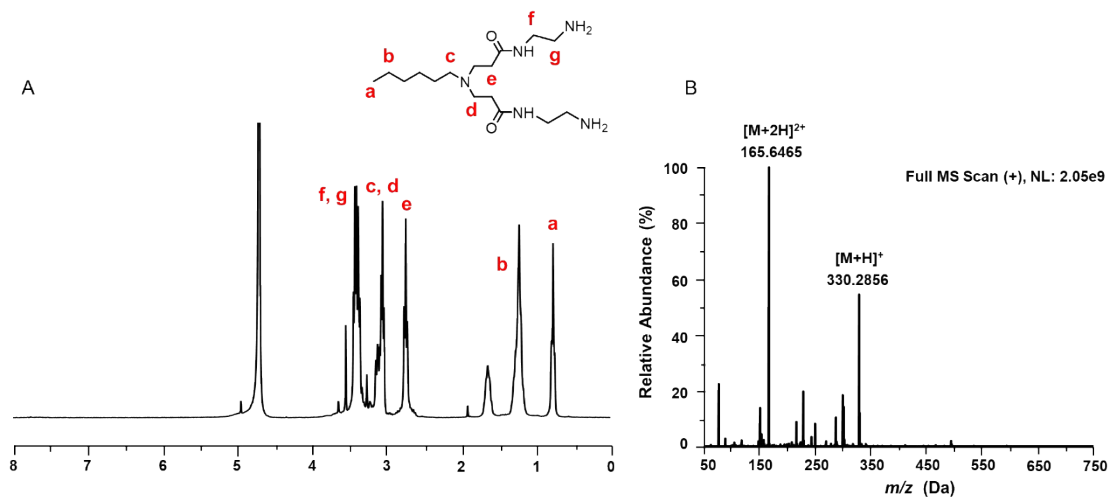

**Figure S1.** A) The  $^1\text{H}$  NMR spectrum of  $\text{C}_6\text{-G}_1$  (300 MHz,  $\text{D}_2\text{O}$ ). B) The ESI mass spectrum of initiator  $\text{C}_6\text{-G}_1$ .

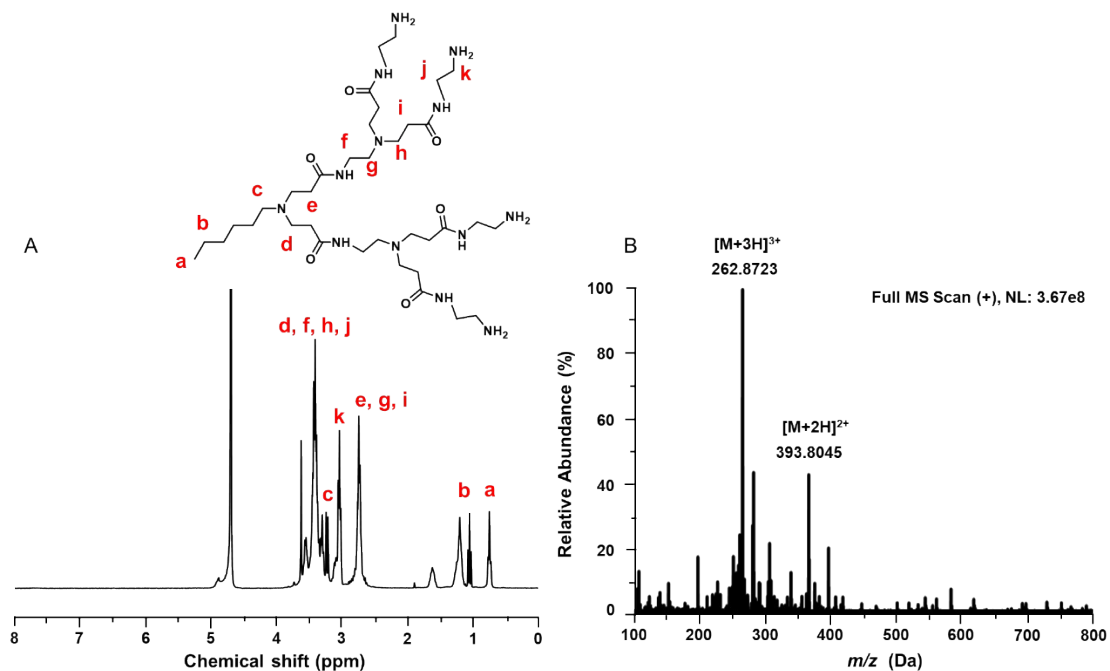

**Figure S2.** A) The  $^1\text{H}$  NMR spectrum of  $\text{C}_6\text{-G}_2$  (300 MHz,  $\text{D}_2\text{O}$ ). B) The ESI mass spectrum of initiator  $\text{C}_6\text{-G}_2$ .

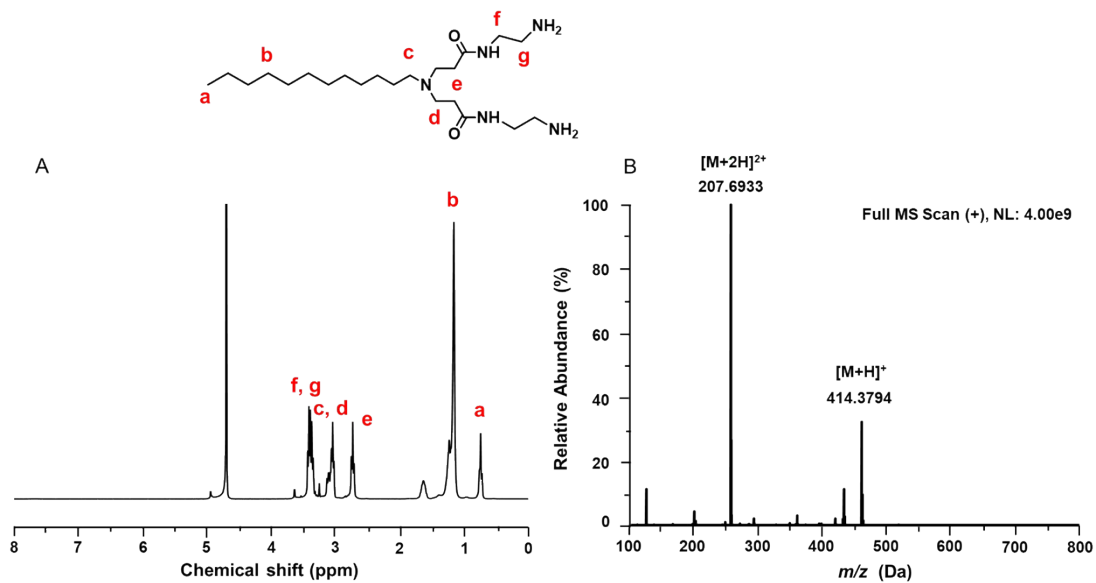

**Figure S3.** A) The  $^1\text{H}$  NMR spectrum of  $C_{12}\text{-G}_1$  (300 MHz,  $\text{D}_2\text{O}$ ). B) The ESI mass spectrum of initiator  $C_{12}\text{-G}_1$ .

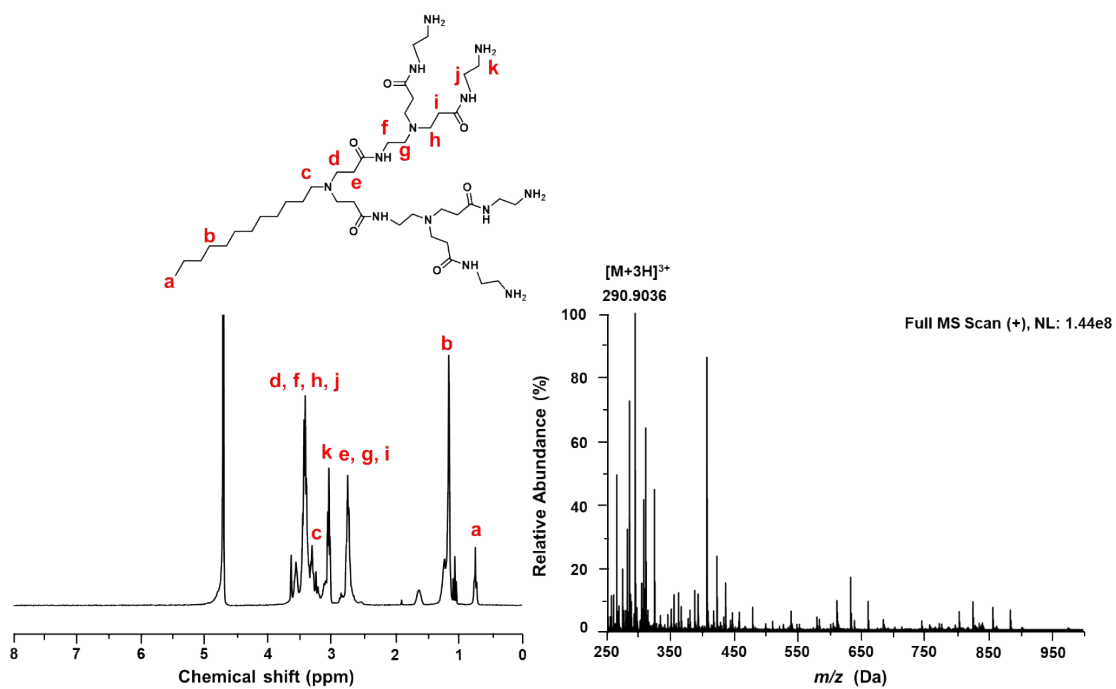

**Figure S4.** A) The  $^1\text{H}$  NMR spectrum of  $C_{12}\text{-G}_2$  (300 MHz,  $\text{D}_2\text{O}$ ). B) The ESI mass spectrum of initiator  $C_{12}\text{-G}_2$ .

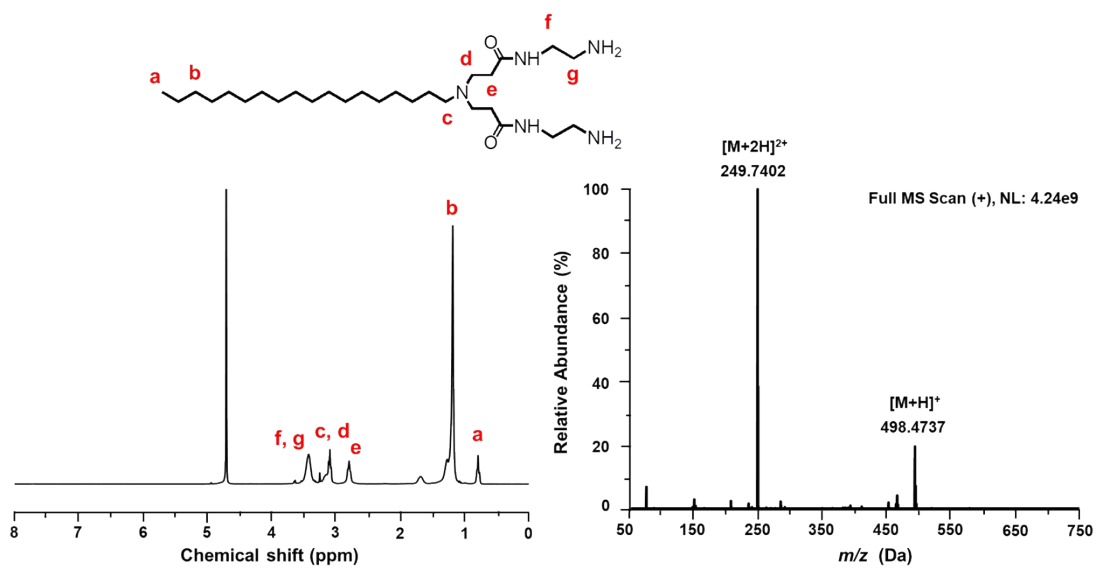

**Figure S5.** A) The  $^1\text{H}$  NMR spectrum of  $C_{18}\text{-G}_1$  (300 MHz,  $\text{D}_2\text{O}$ ). B) The ESI mass spectrum of initiator  $C_{18}\text{-G}_1$ .

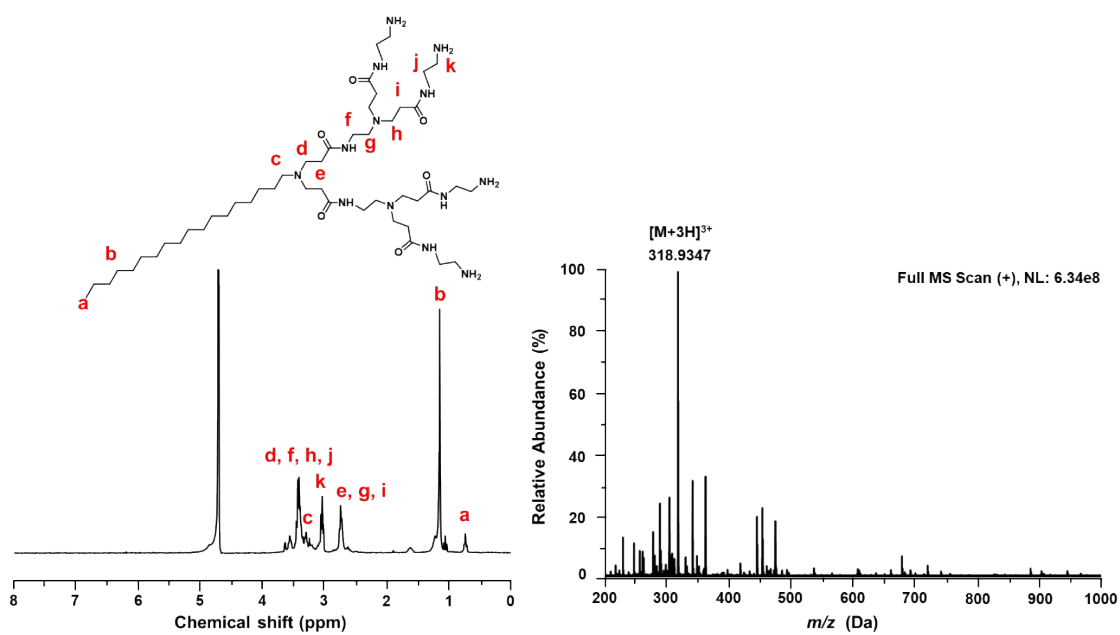

**Figure S6.** A) The  $^1\text{H}$  NMR spectrum of  $C_{18}\text{-G}_2$  (300 MHz,  $\text{D}_2\text{O}$ ). B) The ESI mass spectrum of initiator  $C_{18}\text{-G}_2$ .

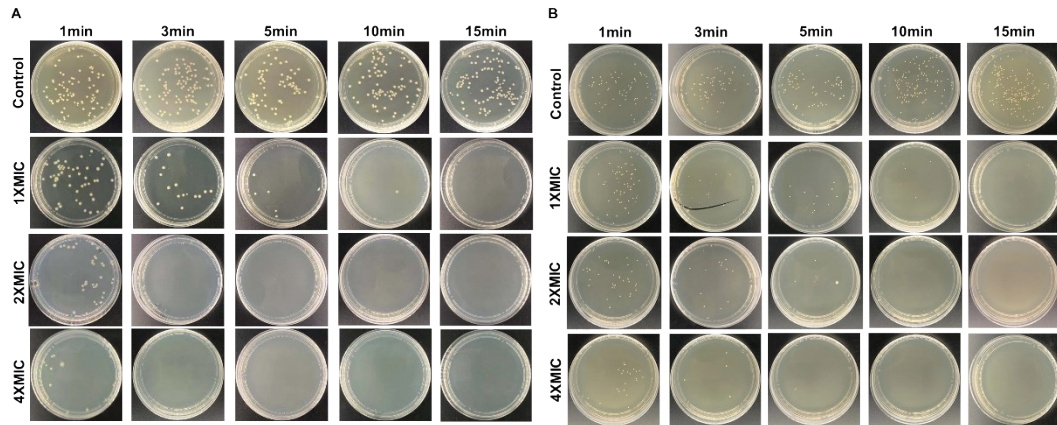

**Figure S7** Agar-plate pictures of (A) *E. coli* and (B) *S. aureus* after incubation with C18-G1 at varying concentrations (1 × MIC, 2 × MIC, and 4 × MIC) and different time (1 min, 3 min, 5 min, 10 min and 15 min).

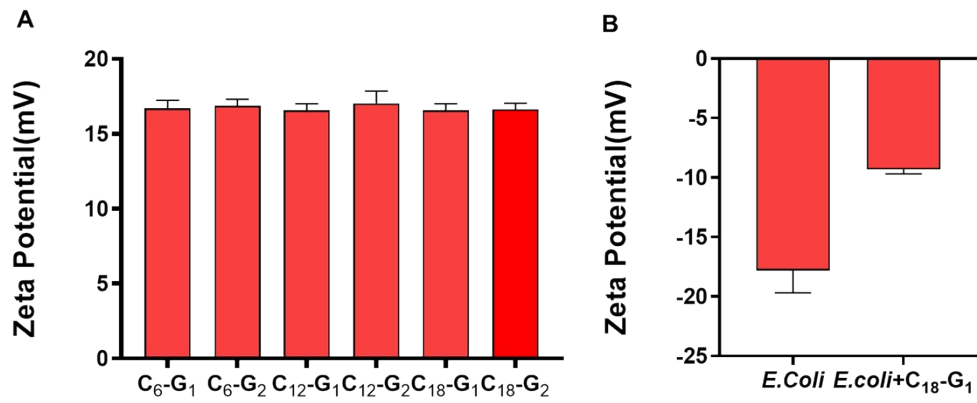

**Figure. S8** (A) Zeta potentials of C<sub>n</sub>-G<sub>x</sub> (B) Zeta potentials of *E. coli* before and after being incubated with C<sub>18</sub>-G<sub>1</sub>.
